# Supplementary material for: A simple in situ synthesis of magnetic M@CNTs by thermolysis of the hybrid perovskite [TPrA][M(dca)3]
Source: Royal Society of Chemistry journal article supplement (doi:10.1039/c6nj03672d), 2017-01-01
Supplement: c6nj03672d1.pdf [file c6nj03672d1.pdf]

## ELECTRONIC SUPPLEMENTARY INFORMATION

### A simple *in situ* synthesis of magnetic M@CNTs by thermolysis of the hybrid perovskite [TPrA][M(dca)<sub>3</sub>]

Juan Manuel Bermúdez-García,<sup>a</sup> Susana Yáñez-Vilar,<sup>b,c</sup> Alberto García-Fernández,<sup>a</sup> Manuel Sánchez-Andújar,<sup>a</sup> Socorro Castro-García,<sup>a</sup> Jorge Mira,<sup>b</sup> Joaquim Agostinho Moreira,<sup>c</sup> Teresa Alvarez Centeno<sup>d</sup> and María Antonia Señarís-Rodríguez<sup>a</sup>

<sup>a</sup> *Universidade da Coruña, Grupo QuiMolMat, Dpt. de Química Fundamental, Facultade de Ciencias e CICA, Campus A Coruña, 15071 A Coruña, Spain.*

<sup>b</sup> *Dpt. Física Aplicada, Universidade de Santiago de Compostela, 15782 Santiago de Compostela, Spain.*

<sup>c</sup> *IFIMUP-IN, Facultade de Ciencias, Universidade do Porto, 4169-007 Porto, Portugal.*

<sup>d</sup> *Instituto Nacional del Carbón (INCAR-CSIC), P. O. Box 73, 33080 Oviedo, Spain.*

\* *j.bermudez@udc.es, m.senaris.rodriguez@udc.es*

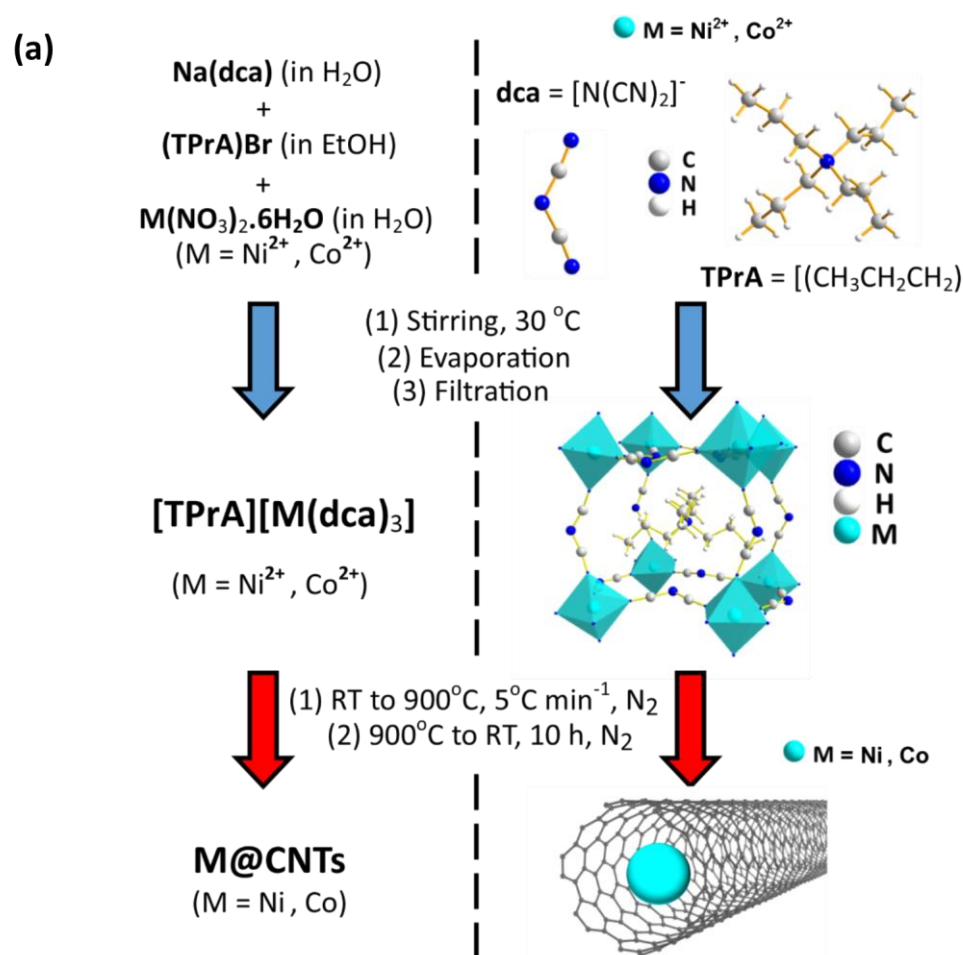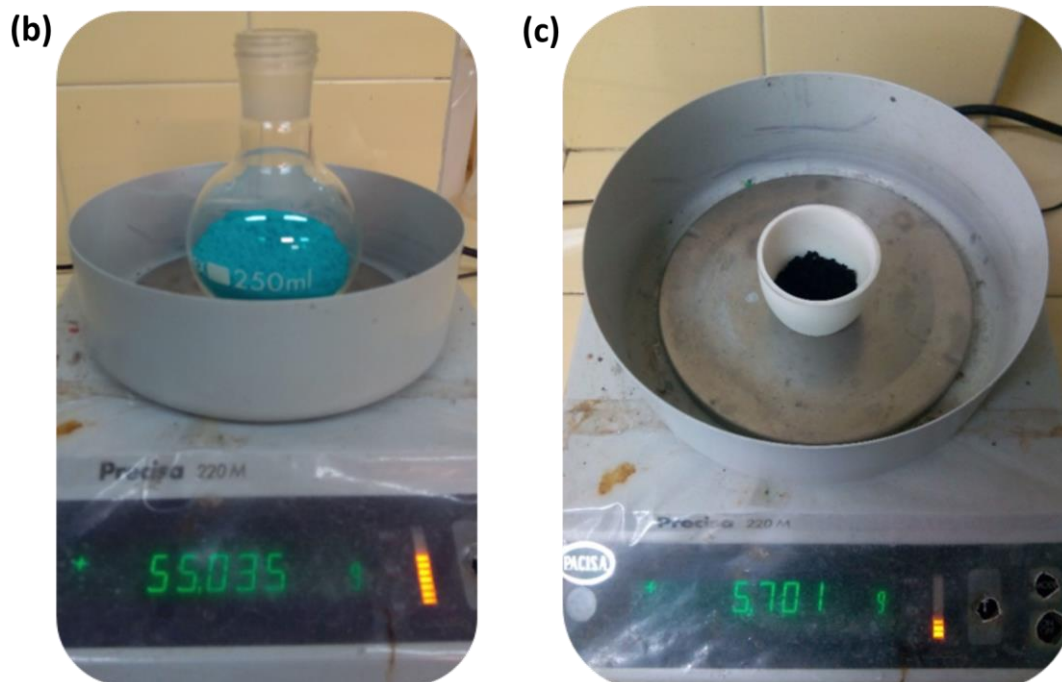

**Figure S1.** (a) Scheme of the synthesis of  $[\text{TPrA}][\text{M}(\text{dca})_3]$  powder and the  $\text{M@CNTs}$ . (b)  $[\text{TPrA}][\text{Ni}(\text{dca})_3]$  powder obtained by the here presented method with a yield of  $\sim 95\%$ . (c)  $\text{Ni@CNTs}$  powder obtained by direct calcination of 35 g of  $[\text{TPrA}][\text{Ni}(\text{dca})_3]$  precursor at  $900^\circ\text{C}$ .

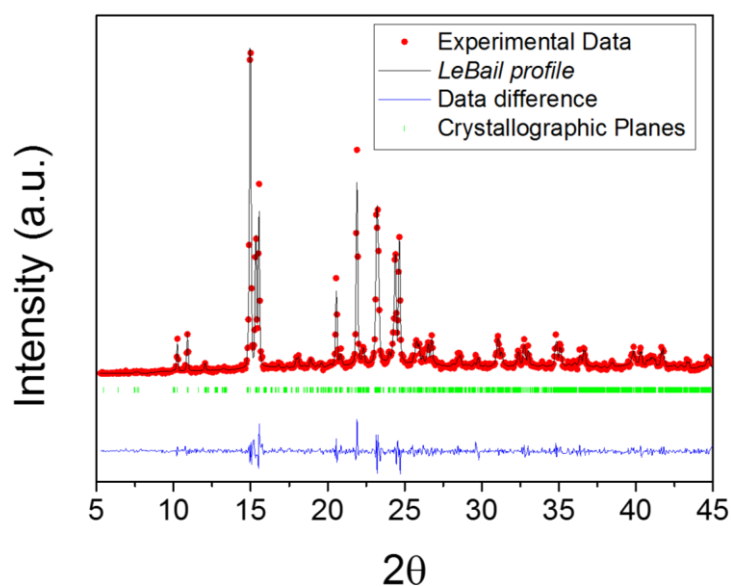

**Figure S2.** Le Bail refinement of the room temperature PXRD pattern of the [TPrA][Co(dca)<sub>3</sub>] compound. Observed (red dots), calculated (black solid line) and difference (blue solid line at the bottom) profiles. The tick green marks indicate the positions of the allowed Bragg reflections.

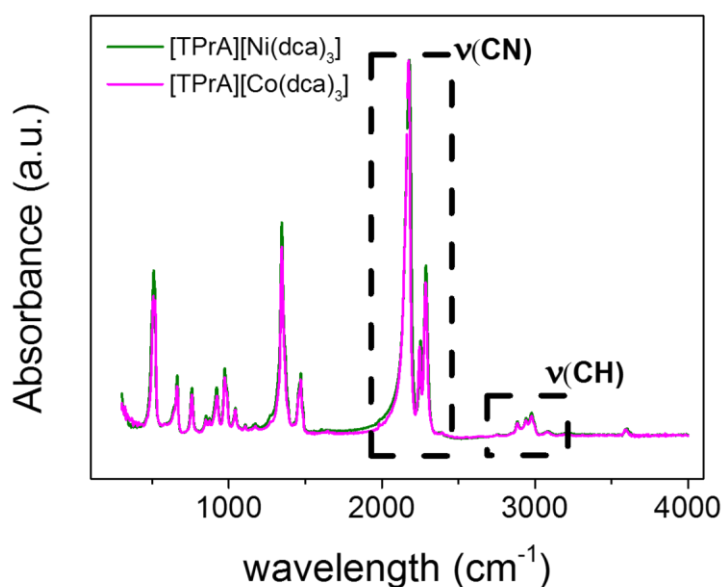

**Figure S3.** FT-IR spectra of [TPrA][M(dca)<sub>3</sub>] where M = Ni<sup>2+</sup> (green) and Co<sup>2+</sup> (pink). The IR bands between 2000 cm<sup>-1</sup> and 2360 cm<sup>-1</sup> are related to the dicyanamide ligand ν(CN) bands: 2286 cm<sup>-1</sup> vs (C≡N), 2230 cm<sup>-1</sup> vs (C–N) + ns(C–N), 2175 cm<sup>-1</sup> vs (C≡N), and the region between 2800 cm<sup>-1</sup> and 3200 cm<sup>-1</sup> correspond to C–H stretching bands of the tetrapropylammonium cations.

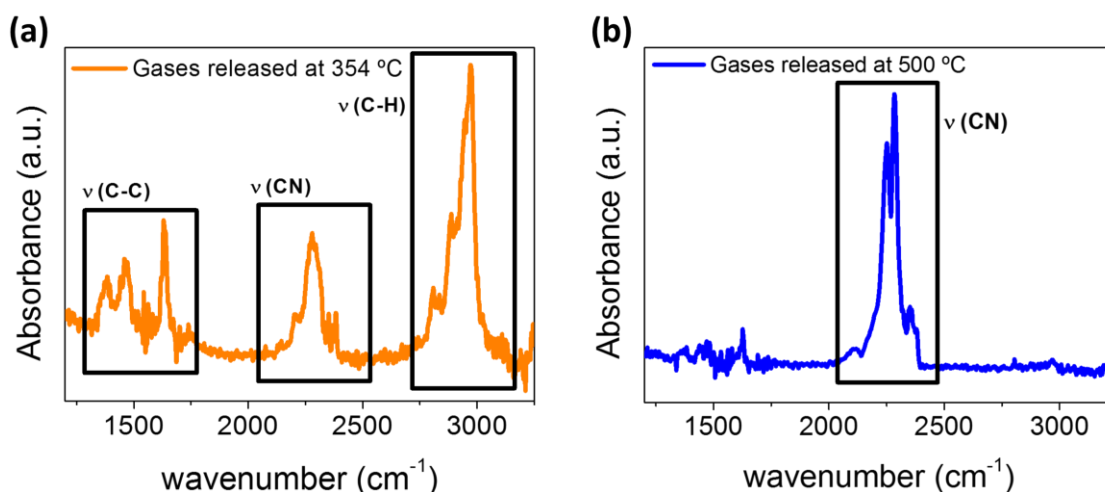

**Figure S4.** FT-IR spectra of the gases released during the thermal decomposition of the precursor [TPrA][Ni(dca)<sub>3</sub>]: (a) at 354 °C, (b) at 500 °C. v(CN) represent both v(C N) and v(C≡N). Graphic (a) is representative for the behaviour during the two first weight losses: the IR bands related to dca ligands (v(CN) = v(C-N) + v(C≡N)) and TPrA cations (v(C-C) and v(C-H)) are observed. Graphic (b) is representative for the third and fourth weight losses: only the dca ligand bands remain, and their intensity decreases as temperature increases.

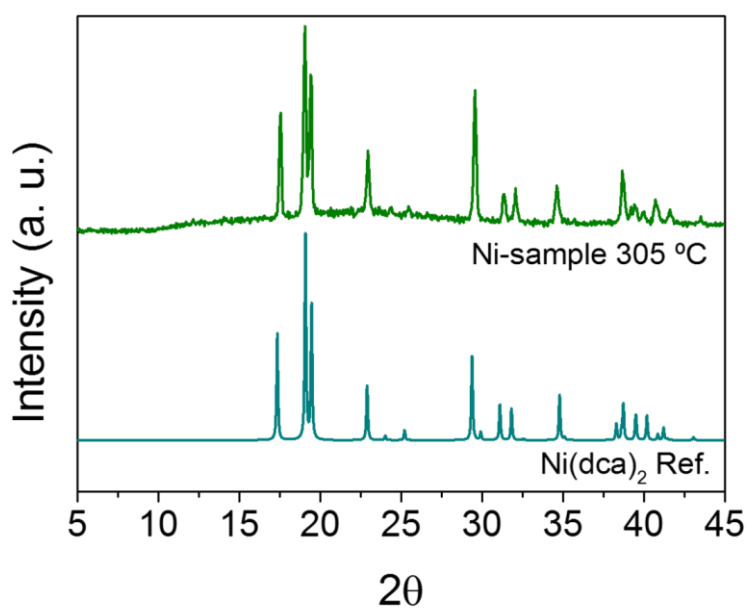

**Figure S5.** PXRD pattern of the [TPrA][Ni(dca)<sub>3</sub>] precursor material annealed at 305 °C compared to that of the Ni(dca)<sub>2</sub> sample reported in Ref.: J. L. Manson, *et al. Chem. Mater.* 1998, **10**, 2552.

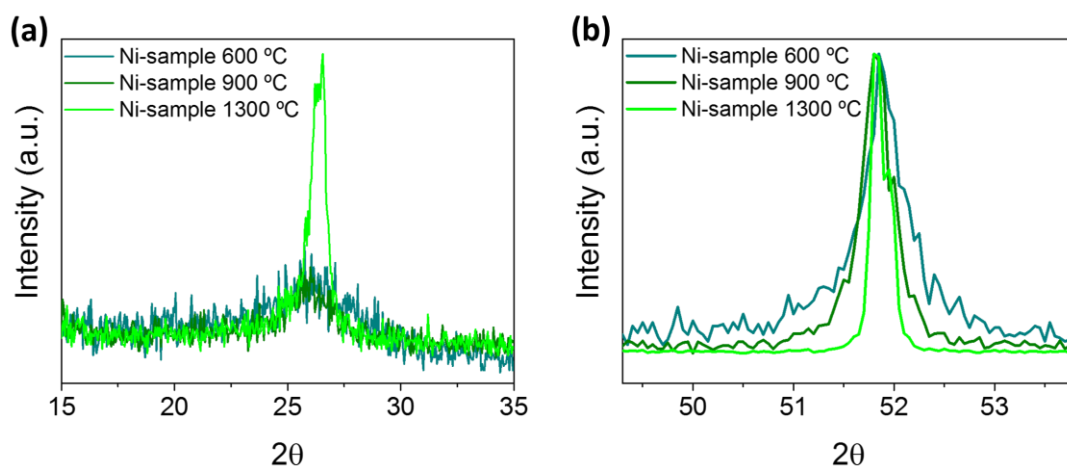

**Figure S6.** (a) Comparison of the graphite peak ( $26.3^\circ 2\theta$ ) for the Ni-sample annealed at different temperatures (600 °C, 900 °C and 1300 °C), with absolute intensities. (b) Comparison of the metallic Ni peak ( $51.9^\circ 2\theta$ ) for the Ni-sample annealed at different temperatures (600 °C, 900 °C and 1300 °C), with normalized intensities for a better comparison of the peak shape.

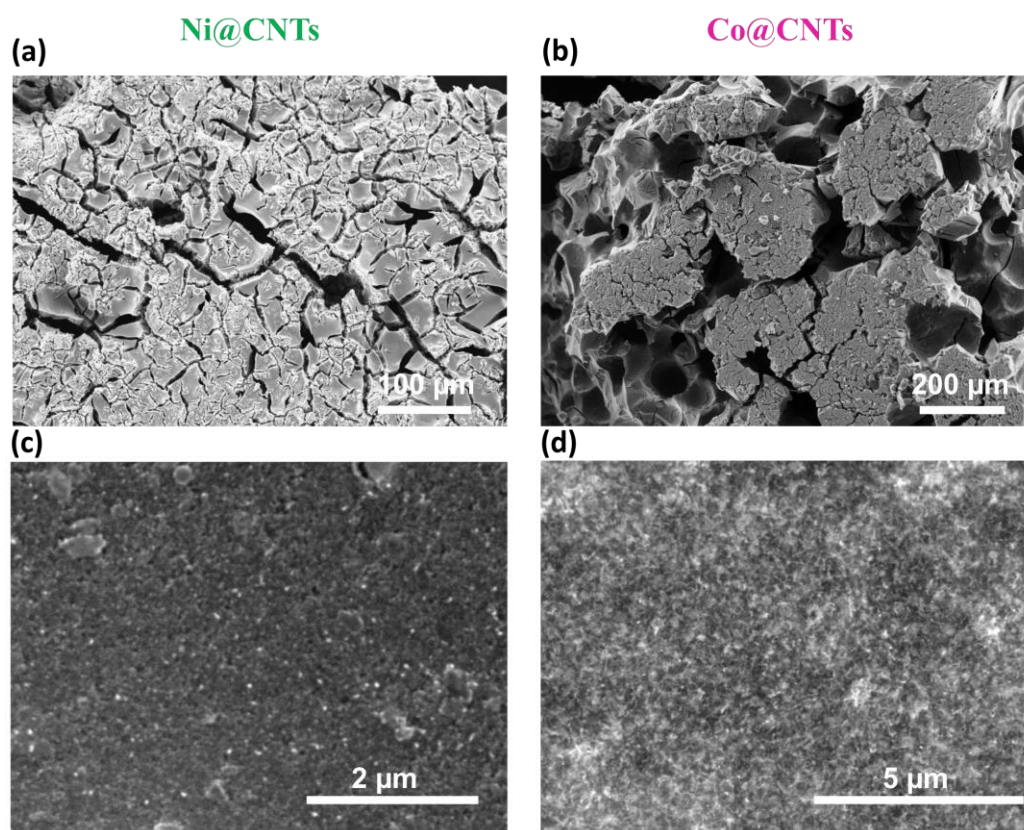

**Figure S7.** Aspect of the M@CNTs samples after the annealing at 900 °C as seen by scanning electron microscopy.

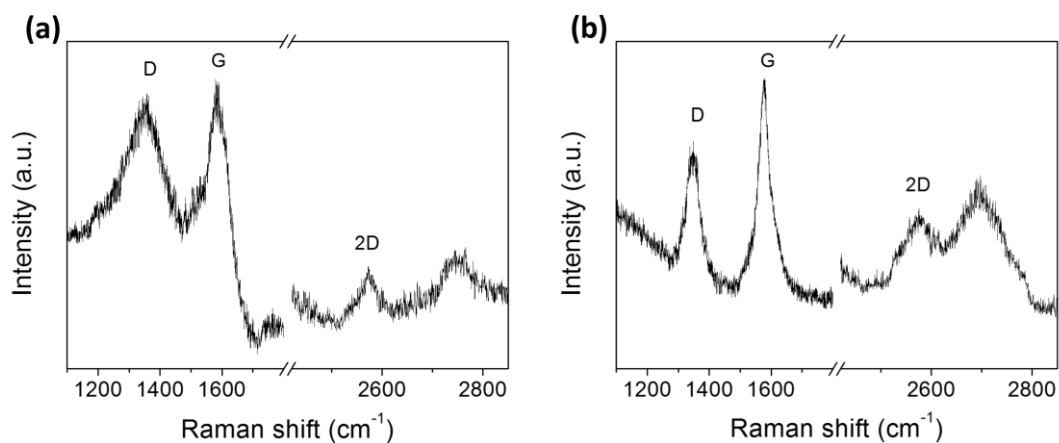

**Figure S8.** Raman spectra of the samples (a) Ni@CNTs and (b) Co@CNTs.

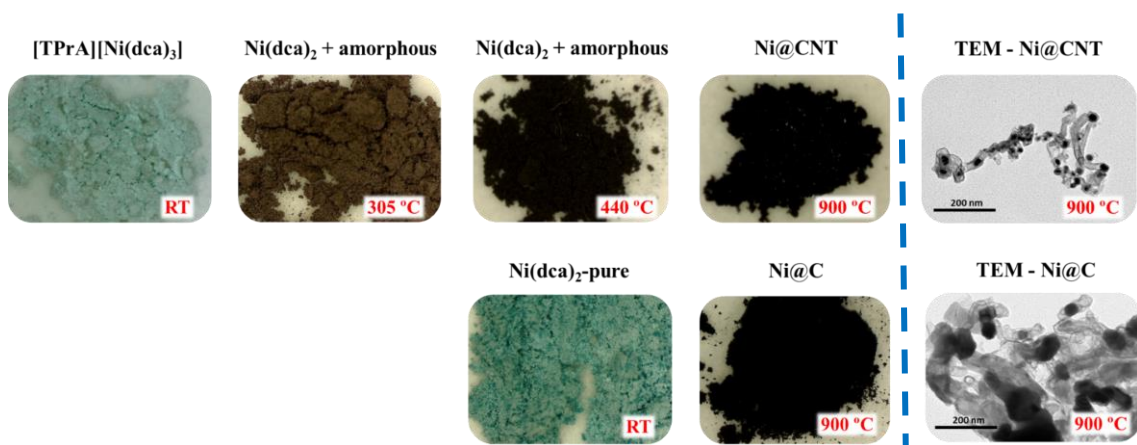

**Figure S9.** Aspect of the  $\text{Ni(dca)}_2$ -pure and  $[\text{TPrA}][\text{Ni(dca)}_3]$  samples, at RT and after annealing at different temperatures, as seen by optical microscopy (on the left of the blue line) and by transmission electron microscopy (on the right of the blue line).

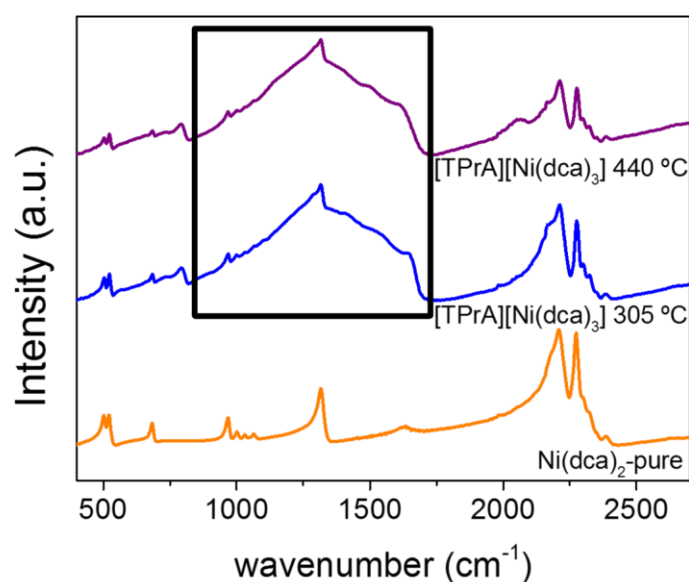

**Figure S10.** FT-IR spectra of Ni(dca)<sub>2</sub>-pure (synthesized according to the method described in reference J.L. Manson *et al. Chem. Mater.* 1998, **10**, 2552) and the product obtained from [TPrA][Ni(dca)<sub>3</sub>] annealed at 305 °C and 440 °C, respectively.

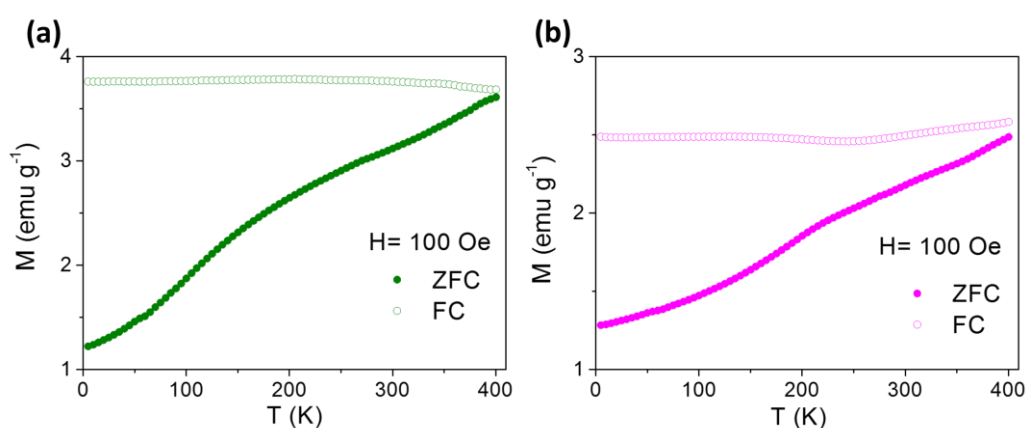

**Figure S11.** Zero-field-cooled (ZFC) and field-cooled (FC) (H= 100 Oe) magnetization curves of (a) Ni@CNT (green) and (b) Co@CNT (pink) obtained at 900 °C.



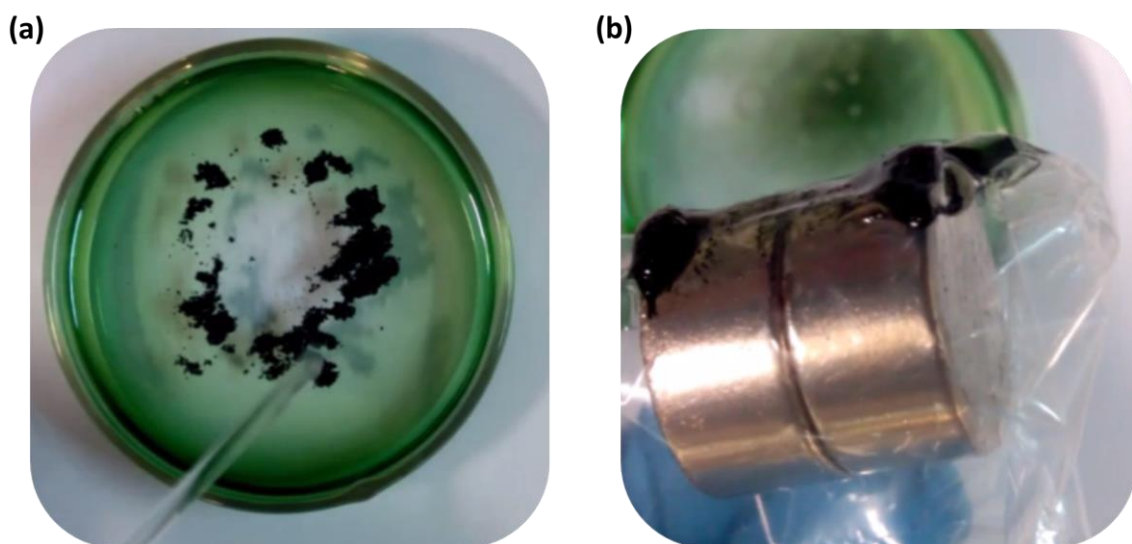

**Figure S12.** (a) M@CNT materials spilled on top of oil-water sample and (b) recovery of M@CNTs with oil adsorbed, using a magnet.

**Table S1.** IR stretching bands of the  $[\text{TPrA}][\text{M}(\text{dca})_3]$  ( $\text{M} = \text{Ni}^{2+}$  and  $\text{Co}^{2+}$ ) compounds.

| $[\text{TPrA}][\text{M}(\text{dca})_3]$<br>IR bands               | wavenumber<br>( $\text{cm}^{-1}$ ) |
|-------------------------------------------------------------------|------------------------------------|
| $\text{vs}(\text{C}\equiv\text{N})$                               | 2286                               |
| $\text{vas}(\text{C}-\text{N})$<br>$\text{ns}(\text{C}-\text{N})$ | 2230                               |
| $\text{vas}(\text{C}\equiv\text{N})$                              | 2175                               |
| (C-H)                                                             | 2800 – 3200                        |



**Table S2.** Comparison of the elemental composition of the precursor [TPrA][M(dca)<sub>3</sub>] compounds (calculated from the nominal formula) and the samples obtained after their annealing at 900 °C (expressed both as % relative and normalized) as obtained from TGA data. Last column: results from the elemental analysis (E.A.) of C, N and H.

|          |       | Precursor<br>[TPrA][M(dca) <sub>3</sub> ] | Annealed<br>at 900 °C<br>(Relative) | Annelaed<br>at 900 °C<br>(Norm.) | E.A.    |
|----------|-------|-------------------------------------------|-------------------------------------|----------------------------------|---------|
| Ni Comp. | Ni(%) | 13.24 %                                   | 13.24 %                             | 79.90 %                          |         |
|          | C (%) | 48.78 %                                   |                                     |                                  | 19.83 % |
|          | N (%) | 31.61 %                                   | 3.33 %                              | 20.10 %                          | 1.09 %  |
|          | H (%) | 6.37 %                                    |                                     |                                  | < 0.1 % |
| Co Comp. | Co(%) | 13.29 %                                   | 13.29 %                             | 55.08 %                          |         |
|          | C (%) | 48.76 %                                   |                                     |                                  | 38.93 % |
|          | N (%) | 31.59 %                                   | 10.84 %                             | 44.92 %                          | 1.26 %  |
|          | H (%) | 6.36 %                                    |                                     |                                  | < 0.1 % |

**Table S3.** Elemental analysis of Ni(dca)<sub>2</sub>-pure (synthesized according to the literature: J. L. Manson *et al. Chem. Mater.* 1998, **10**, 2552) and the product obtained from the annealing of [TPrA][Ni(dca)<sub>3</sub>] at 305 °C and 440 °C.

|                                      | % N   | % C   | % H  | % Total (CNH) |
|--------------------------------------|-------|-------|------|---------------|
| Ni(dca) <sub>2</sub> -pure RT        | 40,99 | 23,66 | 0,54 | 65,18         |
| [TPrA][Ni(dca) <sub>3</sub> ] 305 °C | 38,22 | 33,75 | 2,42 | 74,38         |
| [TPrA][Ni(dca) <sub>3</sub> ] 440 °C | 34,88 | 26,40 | 1,77 | 63,05         |
